# Supplementary material for: Machine learning for the prediction of acute kidney injury in patients after cardiac surgery
Source: Frontiers journal article supplement (doi:10.3389/fsurg.2022.946610), 2022-09-07
Supplement: Table_1.docx [file Table_1.docx]

Table S1. The selected features of four machine learning algorithm

| LASSO features | SVM features | Randomforest-Boruta featuers | Xgboost featuers |
| --- | --- | --- | --- |
| Gender | NGAL | Age | NGAL |
| Weight | NT_prBNP | CRF | NT_prBNP |
| Drink | HJV2 | CVP | HJV2 |
| CRF | FABP | TnI | DKK3 |
| Wb | DKK3 | FABP | Mechanical_ventilation_time |
| EF | TnI | NT_prBNP | TnI |
| TnI | Mechanical_ventilation_time | NGAL | Cleveland |
| FABP | CRF | HJV2 | FABP |
| NGAL | CVP | DKK3 | Hb |
| HJV2 | Age | ICU_length_of_stay | Wb |
| CPBT | ICU_length_of_stay | Mechanical_ventilation_time | Age |
| Erythrocyte_infusion | Hb | Randomforest-Boruta featuers | CVP |
| ICU_length_of_stay | CPBT | Age | BMI |
| Mechanical_ventilation_time | Cleveland | CRF | Urinedroupout |
| Cleveland | Ultrafiltration_volume | CVP | Erythrocyte_infusion |
|  | Hospitalization_time | TnI | Height |
|  |  |  | Interval_time |
|  |  |  | hCT |

| LASSO features | SVM features | Randomforest-Boruta featuers | Xgboost featuers |
| --- | --- | --- | --- |
| Gender | NGAL | Age | NGAL |
| Weight | NT_prBNP | CRF | NT_prBNP |
| Drink | HJV2 | CVP | HJV2 |
| CRF | FABP | TnI | DKK3 |
| Wb | DKK3 | FABP | Mechanical_ventilation_time |
| EF | TnI | NT_prBNP | TnI |
| TnI | Mechanical_ventilation_time | NGAL | Cleveland |
| FABP | CRF | HJV2 | FABP |
| NGAL | CVP | DKK3 | Hb |
| HJV2 | Age | ICU_length_of_stay | Wb |
| CPBT | ICU_length_of_stay | Mechanical_ventilation_time | Age |
| Erythrocyte_infusion | Hb |  | CVP |
| ICU_length_of_stay | CPBT |  | BMI |
| Mechanical_ventilation_time | Cleveland |  | Urinedroupout |
| Cleveland | Ultrafiltration_volume |  | Erythrocyte_infusion |
|  | Hospitalization_time |  | Height |
|  |  |  | Interval_time |
|  |  |  | hCT |
